# Supplementary material
Source: publisher figshare collection journal article supplement (https://acs.figshare.com/ndownloader/files/4454326)
Supplement: Supplementary file 1 [file 4454326]

## **Supporting Information**

### **Atmospheric reactivity of vinyl acetate: kinetic and mechanistic study of its gas-phase oxidation by OH, O<sub>3</sub> and NO<sub>3</sub>**

B. Picquet-Varrault, M. Scarfogliero and J-F. Doussin

Number of SI : 7

Number of pages : 8 (including this one)

#### **List of Supporting Information:**

Table S1: Initial conditions of the experiments

Table S2: Integrated band intensities of the main absorption band of reactants and oxidation products (in base e)

Figure S1: Concentration-time profiles of reactants and products corresponding to the photolysis of a mixture vinyl acetate/isopropyl nitrite/NO (experiment 4).

Figure S2: Relative kinetic plot for NO<sub>3</sub>-oxidation of vinyl acetate with propene as reference compound.

Figure S3: Absolute kinetic plot for NO<sub>3</sub>-oxidation of vinyl acetate.

Figure S4: Absolute kinetic plot for O<sub>3</sub>-oxidation of vinyl acetate.

Figure S5: Formation yields of products by ozonolysis of vinyl acetate for experiment 6.

Table S1: Initial conditions of the experiments

| Experiment number | Oxidant         | Experiment type | Initial conditions (ppm)                                                |
|-------------------|-----------------|-----------------|-------------------------------------------------------------------------|
| 1                 | OH              | RR/mechanistic  | [VA] = 1.7 ; [propene] = 2.3 ; [CH <sub>3</sub> ONO] = 1.3 ; [NO] = 1.7 |
| 2                 | OH              | RR/mechanistic  | [VA] = 1.5 ; [propene] = 1.8 ; [CH <sub>3</sub> ONO] = 1.1 ; [NO] = 1.8 |
| 3                 | OH              | RR/mechanistic  | [VA] = 0.8 ; [propene] = 2.1 ; [CH <sub>3</sub> ONO] = 1.3 ; [NO] = 1.7 |
| 4                 | OH              | Mechanistic     | [VA] = 1.7 ; [C <sub>3</sub> H <sub>7</sub> ONO] = ; [NO] = 2.0         |
| 5                 | O <sub>3</sub>  | AR/mechanistic  | [VA] = 1.1; [O <sub>3</sub> ] = 1.4; [CO] = 2000                        |
| 6                 | O <sub>3</sub>  | AR/mechanistic  | [VA] = 1.2; [O <sub>3</sub> ] = 4.5; [CO] = 2000                        |
| 7                 | NO <sub>3</sub> | RR/mechanistic  | [VA] = 2.2; [propene] = 3.7; [N <sub>2</sub> O <sub>5</sub> ] = 5.4     |
| 8                 | NO <sub>3</sub> | RR/mechanistic  | [VA] = 2.3; [propene] = 3.5; [N <sub>2</sub> O <sub>5</sub> ] = 5.6     |
| 9                 | NO <sub>3</sub> | RR/mechanistic  | [VA] = 2.3; [propene] = 3.7; [N <sub>2</sub> O <sub>5</sub> ] = 6.2     |
| 10                | NO <sub>3</sub> | Mechanistic     | [VA] = 0.7; [N <sub>2</sub> O <sub>5</sub> ] = 4.9                      |
| 11                | NO <sub>3</sub> | Mechanistic     | [VA] = 0.8; [N <sub>2</sub> O <sub>5</sub> ] = 3.1                      |
| 12                | NO <sub>3</sub> | Mechanistic     | [VA] = 1.1; [N <sub>2</sub> O <sub>5</sub> ] = 5.6                      |

RR: relative rate; AR: absolute rate

Table S2: Integrated band intensities of the main absorption band of reactants and oxidation products (in base e)

| Compound                 | Main absorption band       | IBI/cm.molecule <sup>-1</sup>     | Reference |
|--------------------------|----------------------------|-----------------------------------|-----------|
| <b>Infrared region</b>   |                            |                                   |           |
| Ozone                    | 1085-950 cm <sup>-1</sup>  | $(1.47 \pm 0.03) \times 10^{-17}$ | 35        |
| Vinyl acetate            | 1275-1175 cm <sup>-1</sup> | $(7.2 \pm 0.3) \times 10^{-17}$   | This work |
| Formic acetic anhydride  | 1095-1005 cm <sup>-1</sup> | $(5.99 \pm 0.13) \times 10^{-17}$ | 23        |
| Formaldehyde             | 3100-2600 cm <sup>-1</sup> | $(2.92 \pm 0.10) \times 10^{-17}$ | 36        |
| Acetic acid              | 1840-1712 cm <sup>-1</sup> | $(4.36 \pm 0.24) \times 10^{-17}$ | 23        |
| Formic acid              | 1150-1045 cm <sup>-1</sup> | $3.92 \times 10^{-17}$            | 37        |
| <b>UV-visible region</b> |                            |                                   |           |
| NO <sub>3</sub>          | 675-650 nm                 | $1.09 \times 10^{-16}$            | 38        |

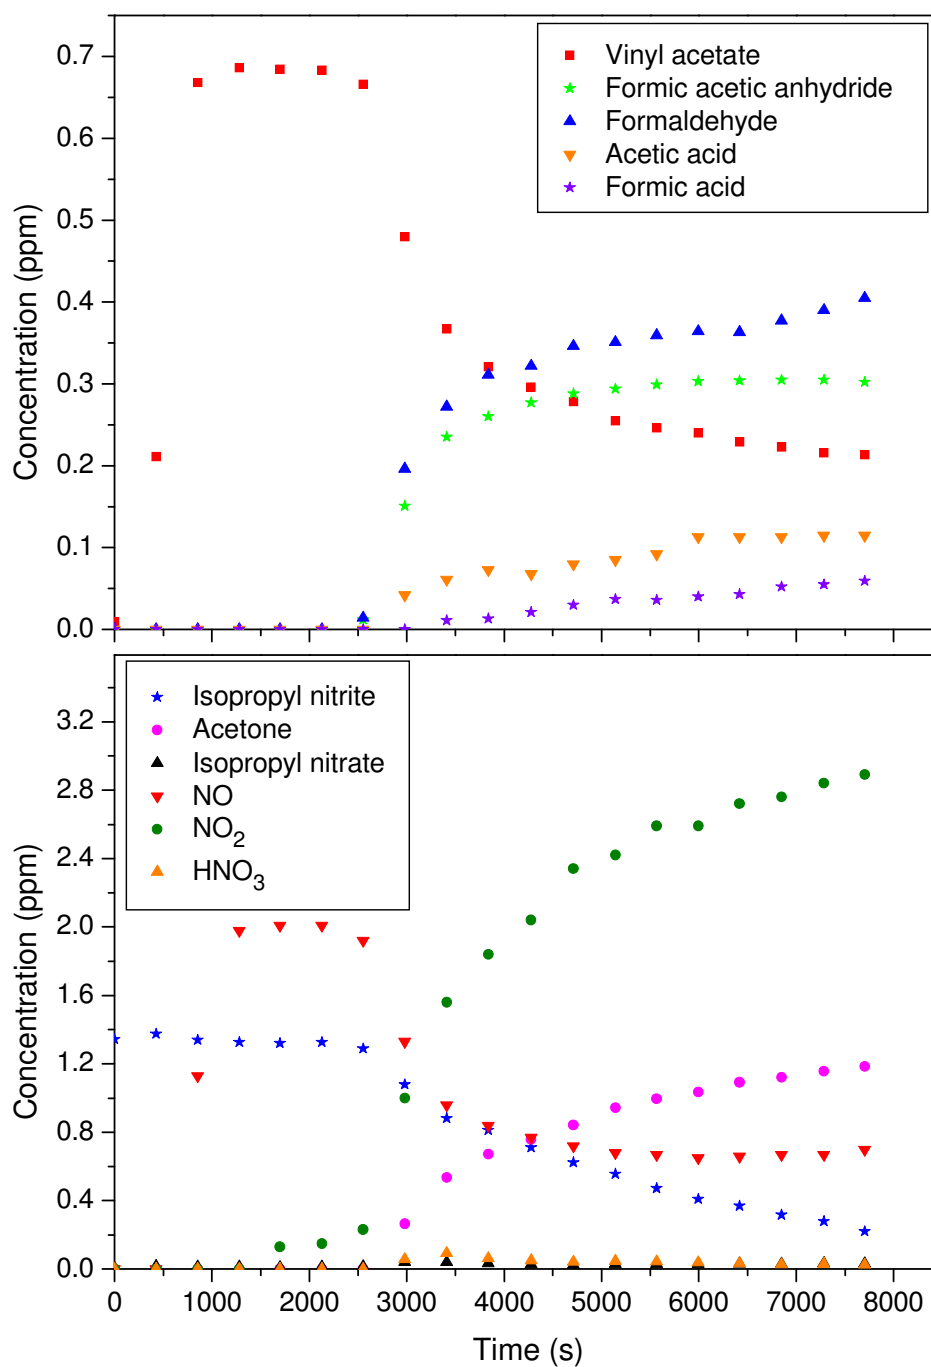

Figure S1: Concentration-time profiles of reactants and products corresponding to the photolysis of a mixture vinyl acetate/isopropyl nitrite/NO (experiment 4).

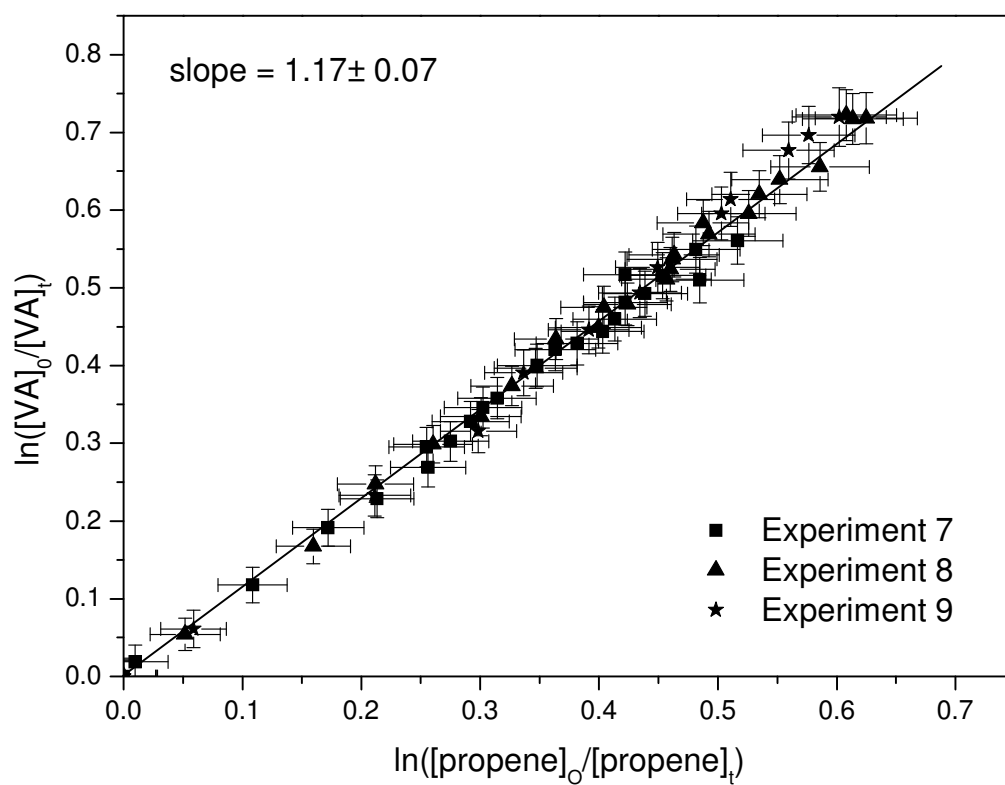

Figure S2: Relative kinetic plot for  $\text{NO}_3$ -oxidation of vinyl acetate with propene as reference compound.

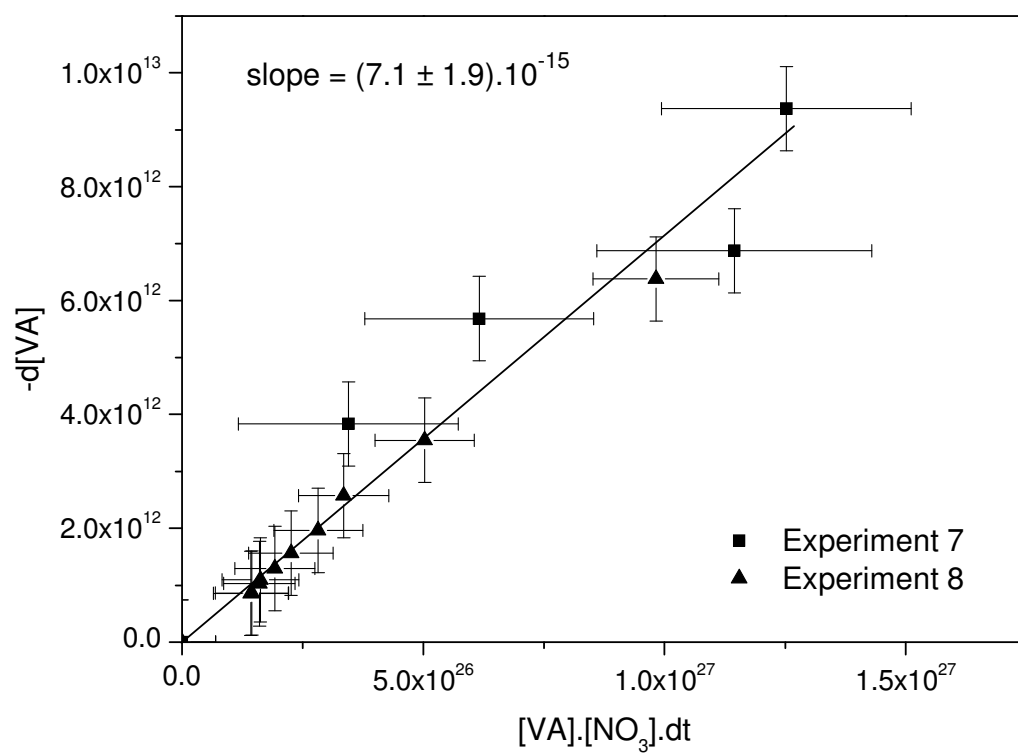

Figure S3: Absolute kinetic plot for  $\text{NO}_3$ -oxidation of vinyl acetate.

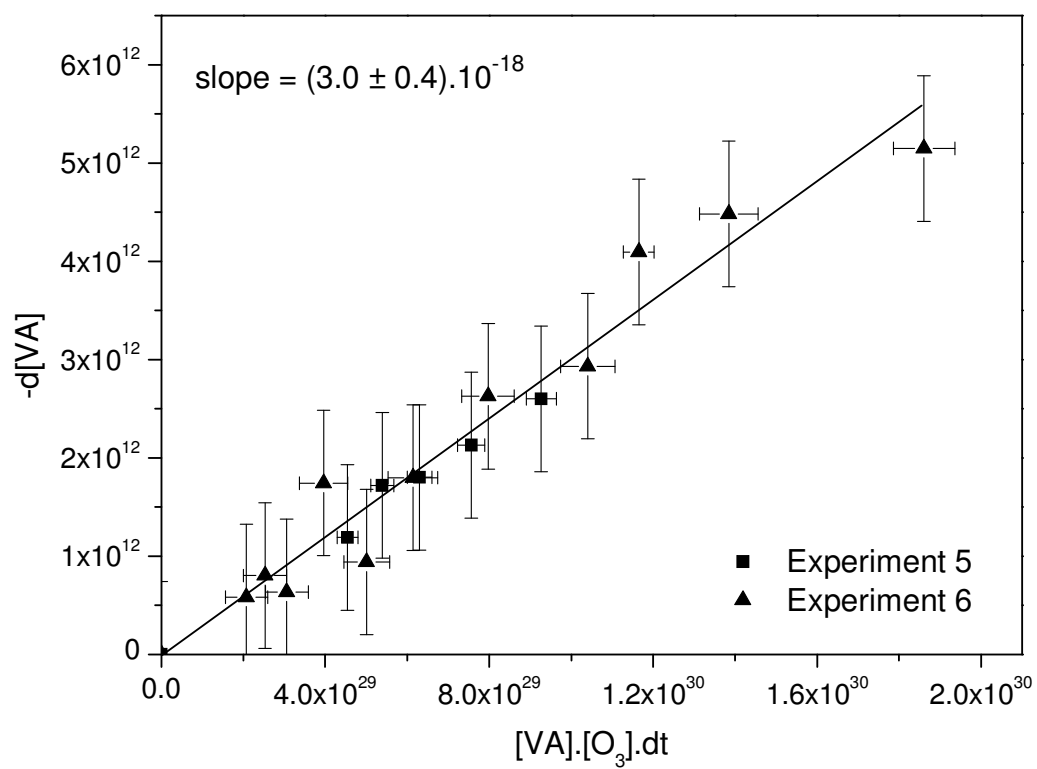

Figure S4: Absolute kinetic plot for  $O_3$ -oxidation of vinyl acetate.

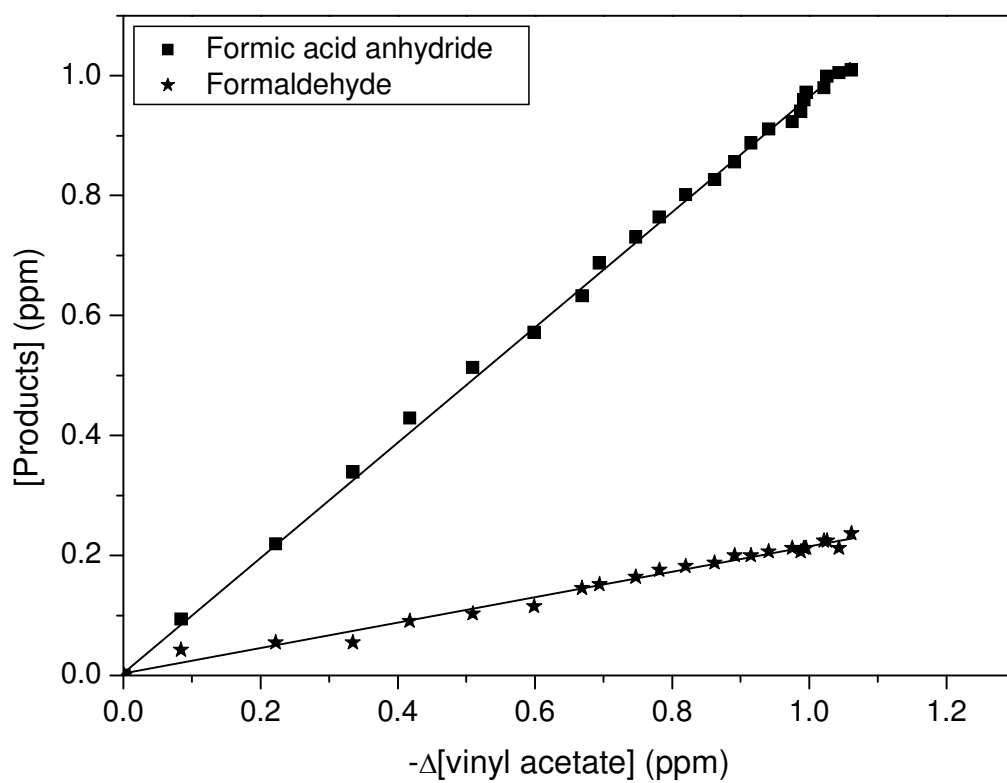

Figure S5: Formation yields of products by ozonolysis of vinyl acetate for experiment 6.
